# Supplementary material
Source: MDPI journal article supplement (https://www.mdpi.com/2071-1050/12/14/5566)
Supplement: s1 [file s1]

Supplementary Materials

# Environmental Risk Assessment of Living Modified Microorganisms (LMM) on the Indigenous Microbial Community

Hyosun Lee <sup>1</sup>, Dong-Uk Kim <sup>2</sup>, Jigwan Son <sup>1</sup>, Seong-Bo Kim <sup>3</sup> and Jong-Ok Ka <sup>1,\*</sup>

<sup>1</sup> Department of Agricultural Biotechnology and Research Institute of Agriculture and Life Sciences, Seoul National University, 08826 Seoul, Korea; watermelon@snu.ac.kr (H.L.); sonjigwan@snu.ac.kr (J.S.)

<sup>2</sup> Department of Biological Science, College of Science and Engineering, Sangji University, 26339 Wonju-si, Korea; dukim@sangji.ac.kr

<sup>3</sup> Bio-Living Engineering Major, Global Leaders College, Yonsei University, 03722 Seoul, Korea; seongbo.kim@yonsei.ac.kr

\* Correspondence: joka@snu.ac.kr

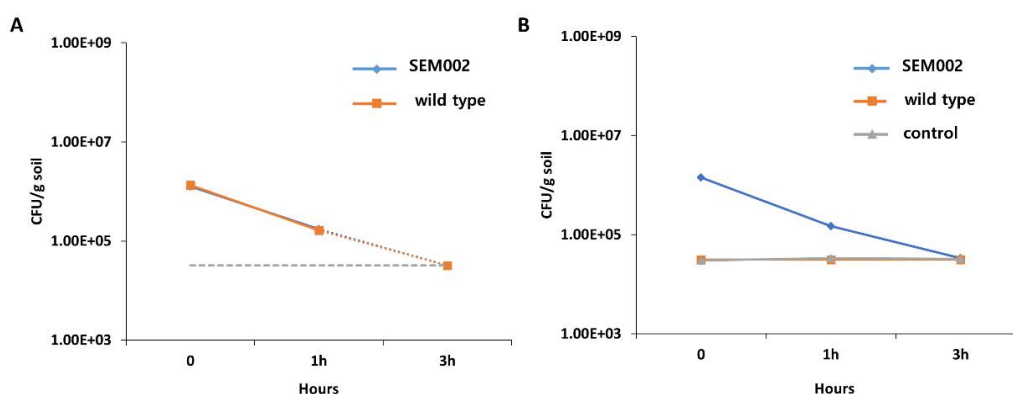

**Figure S1.** Changes in the bacterial counts of LMM and wild-type strains in LB medium and LPK medium after the release of LMM and wild-type strains into forest soil microcosm. A, LB medium; B, LPK medium. SEM002, number of SEM002 cells in the SEM002-inoculated soil; wild type, number of wild-type cells in the wild type-inoculated soil; control, antibiotic-resistant bacterial counts in the control group. Dotted lines indicate that the inoculated strains were undetectable after 3 h of the experiment. Dotted lines parallel to the x-axis indicate the background level of indigenous microorganisms.

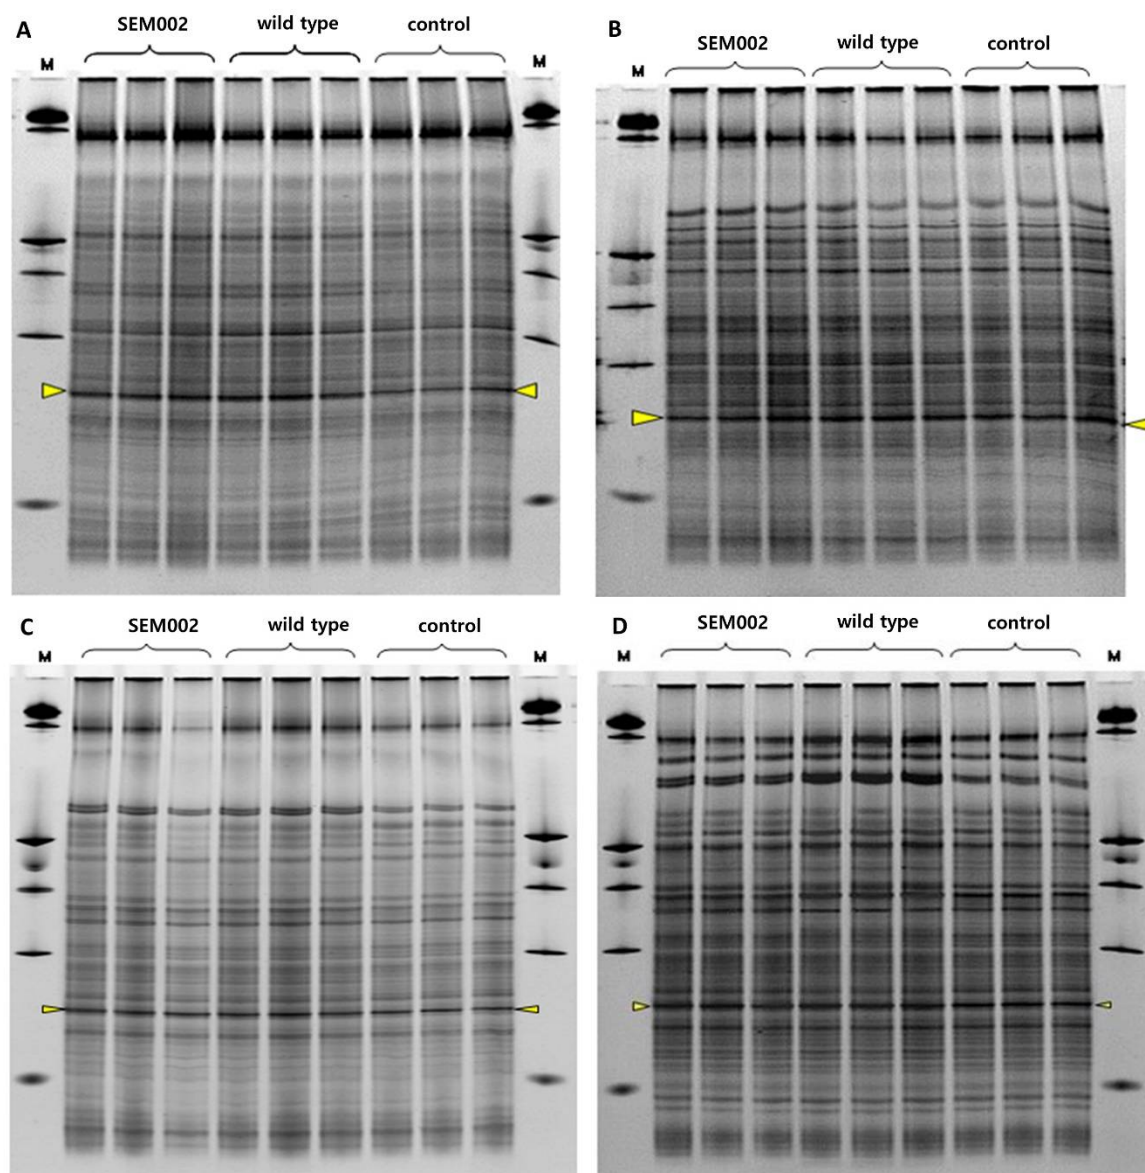

**Figure S2.** Analysis of structural changes of the bacterial community in the factory soil microcosm experiment using real-time PCR-DGGE. A, Day 15; B, Day 35; C, Day 55; D, Day 75. SEM002, LMM-inoculated soil; Wild type, ATCC 13032 strain-inoculated soil; Control, uninoculated soil. The arrows indicate DGGE bands of LMM and wild-type strains.

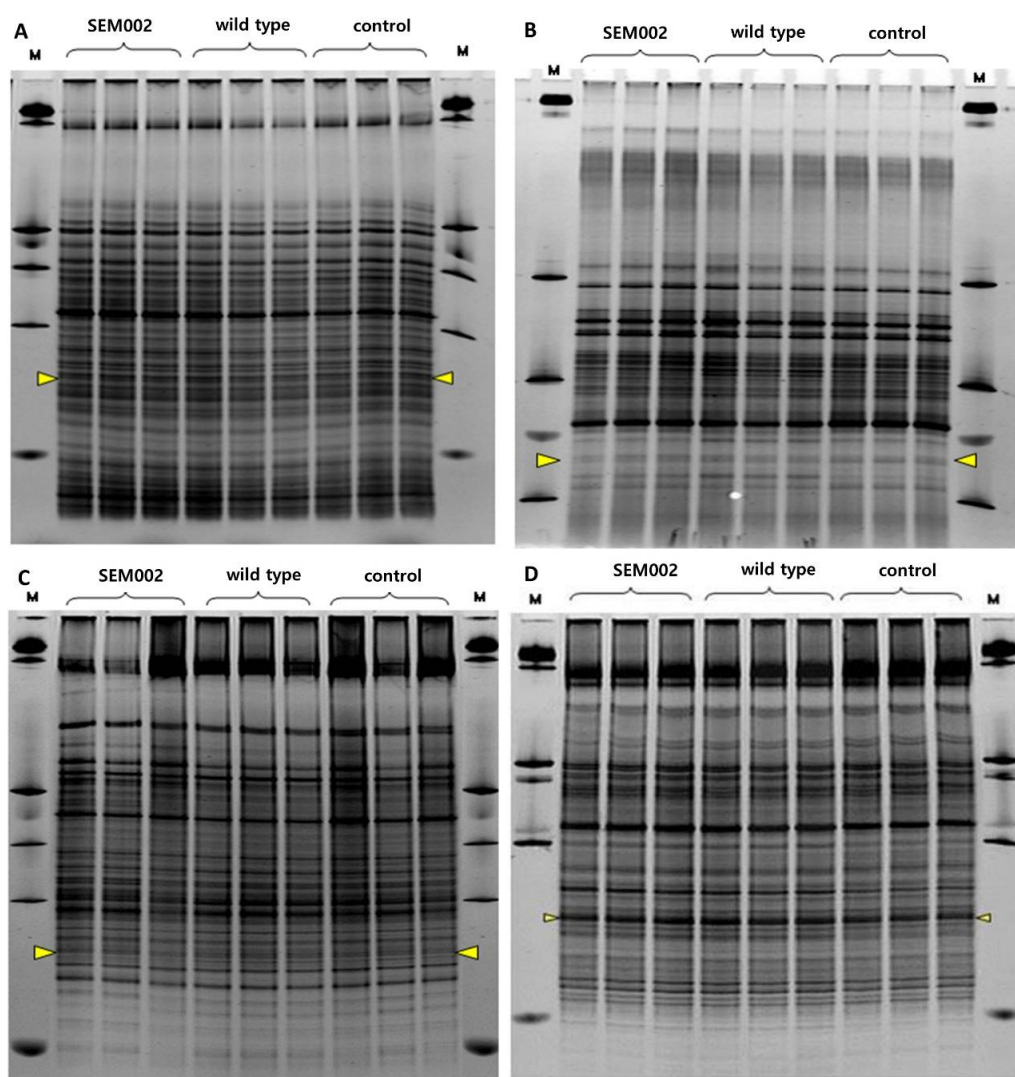

**Figure S3.** Analysis of structural changes of the bacterial community in the factory soil microcosm experiment using real-time PCR-DGGE. A, Day 13; B, Day 33; C, Day 54; D, Day 75. SEM002, LMM-inoculated soil; Wild type, ATCC 13032 strain-inoculated soil; Control, uninoculated soil. The arrows indicate DGGE bands of LMM and wild-type strains.

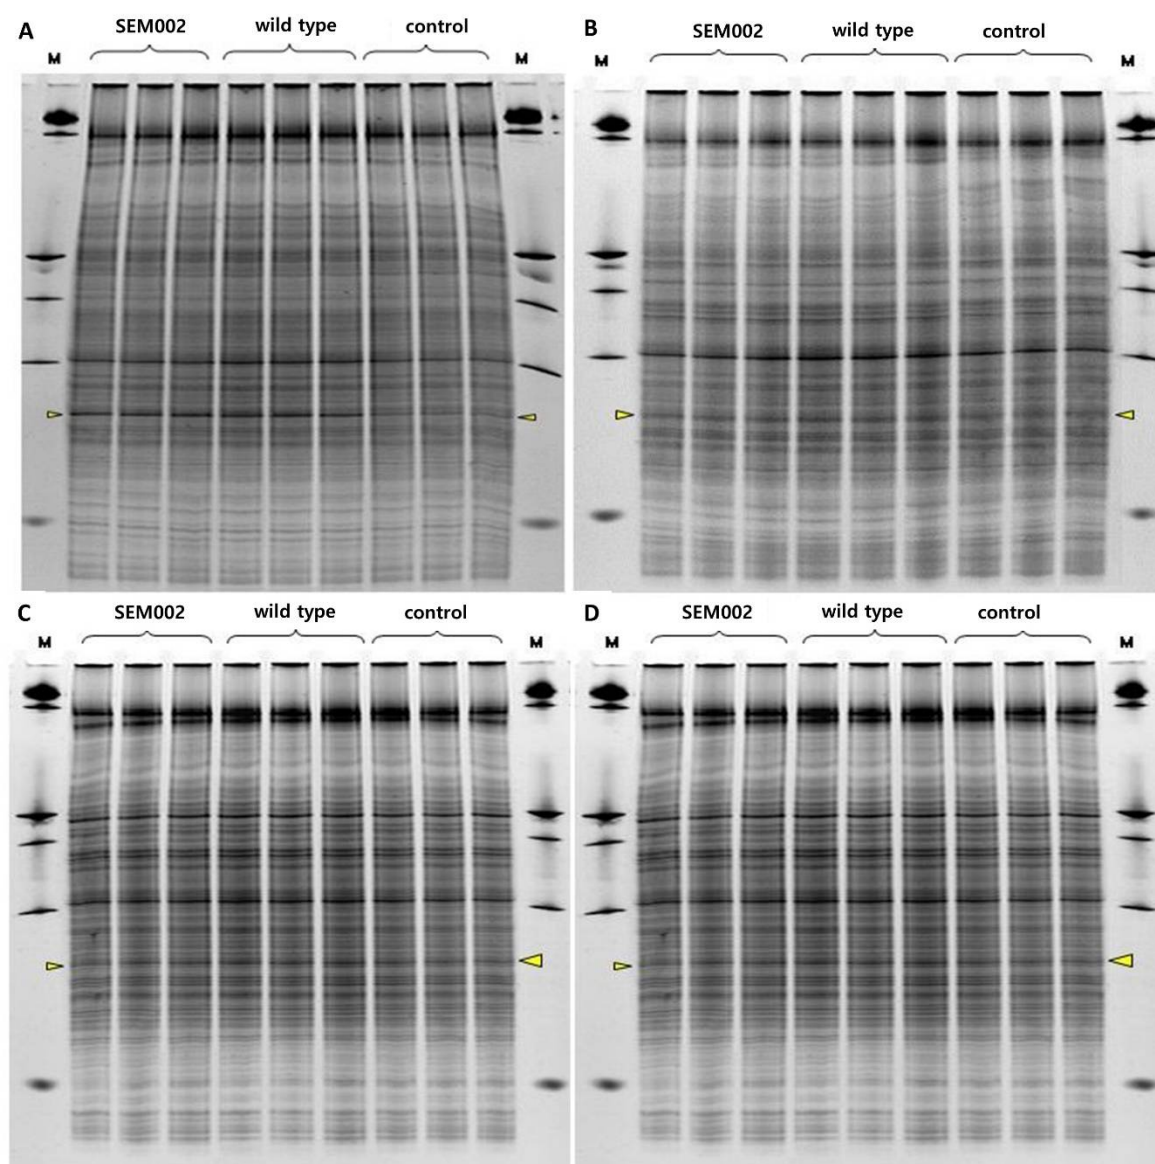

**Figure S4.** Analysis of structural changes of the bacterial community in the factory soil microcosm experiment using real-time PCR-DGGE. A, Day 15; B, Day 35; C, Day 55; D, Day 75. SEM002, LMM-inoculated soil; Wild type, ATCC 13032 strain-inoculated soil; Control, uninoculated soil. The arrows indicate DGGE bands of LMM and wild-type strains.
